# Supplementary material
Source: PubMed Central journal article supplement (PMC6641279)
Supplement: ao7b01698_si_001.pdf [file ao7b01698_si_001.pdf]

## Supporting Information

### **Solution Plasma Process Derived Defect Induced Hetero-phase anatase:brookite TiO<sub>2</sub> Nanocrystals for Enhanced Gaseous Photocatalytic Performance**

Sudhagar Pitchaimuthu,<sup>a,e,†</sup> Kaede Honda,<sup>b</sup> Shoki Suzuki,<sup>b</sup> Akane Naito,<sup>b</sup> Norihiro Suzuki,<sup>b</sup> Ken-ichi Katsumata,<sup>b</sup> Kazuya Nakata,<sup>a,b</sup> Naoya Ishida,<sup>a,b</sup> Naoto Kitamura,<sup>a,b</sup> Yasushi Idemoto,<sup>a,b</sup> Takeshi Kondo,<sup>a,b</sup> Makoto Yuasa,<sup>a,b</sup> Osamu Takai,<sup>c</sup> Tomonaga Ueno,<sup>d</sup> Nagahiro Saito,<sup>d</sup> Akira Fujishima,<sup>a</sup> Chiaki Terashima,<sup>a,\*</sup>

*a. Photocatalysis International Research Center, Research Institute for Science & Technology, Tokyo University of Science, 2641 Yamazaki, Noda, Chiba 278-8510, JAPAN.*

*b. Faculty of Science and Technology, Tokyo University of Science, 2641 Yamazaki, Noda, Chiba 278-8510, JAPAN*

*c. Materials and Surface Engineering Research Institute, Kanto Gakuin University, 1162-2 Ogikubo, Odawara, Kanagawa 250-0042, JAPAN*

*d. Department of Materials, Physics and Energy Engineering, Graduate School of Engineering, Nagoya University, Furo-cho, Chikusa-ku, Nagoya 464-8603, JAPAN*

*e. Multi-functional Photocatalyst and Coatings Group, SPECIFIC, College of Engineering, Swansea University (Bay Campus), Swansea SA1 8EN, Wales, United Kingdom.*

#### **S1. Experimental – sample information**

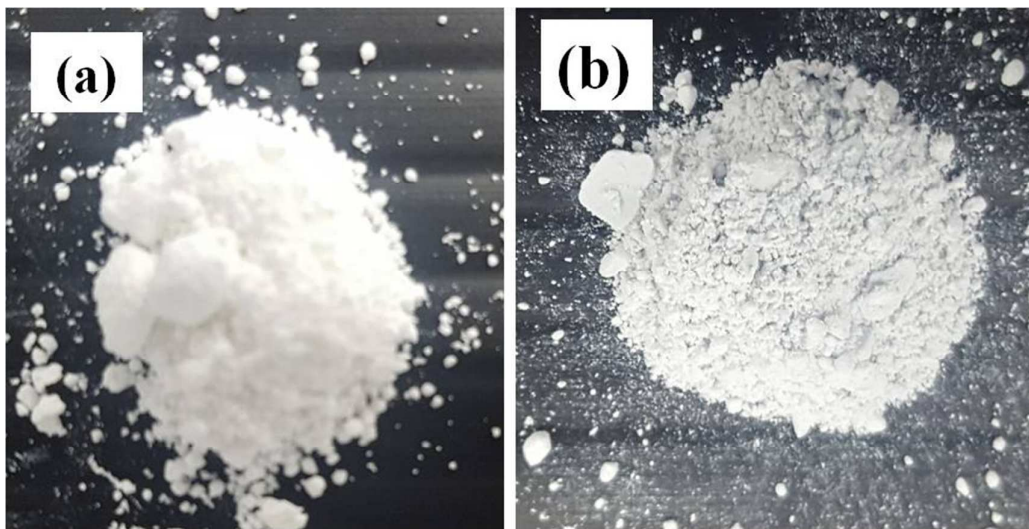

**Figure S1.** Photographs of samples (a) untreated ST-1 TiO<sub>2</sub> and (b) SPP treated ST-1 TiO<sub>2</sub> (3 hrs).

## S2. Crystal structure analysis:

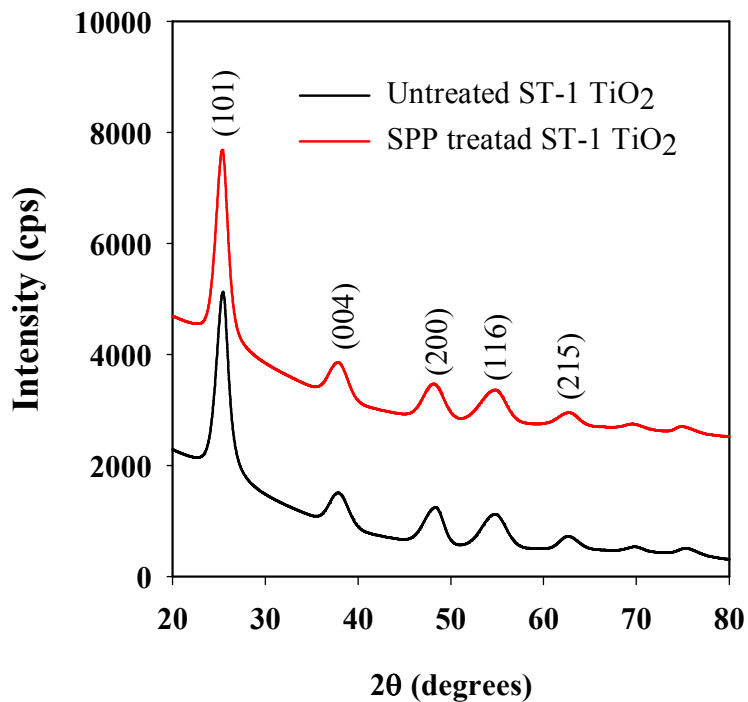

**Figure S2.** X-ray diffraction spectra of untreated and SPP treated ST-1 TiO<sub>2</sub>.

From Figure S2, the observed peaks at 25.2° , 37.8° , 48.8° , 54.7° and 62.8° are corresponding to the (101), (004), (200), (116), and (215) crystalline phase of anatase TiO<sub>2</sub> (JCPDS 00-021-1272). There is no significant difference between untreated and SPP treated ST-TiO<sub>2</sub> sample is identified.

### S3. Crystal lattice analysis

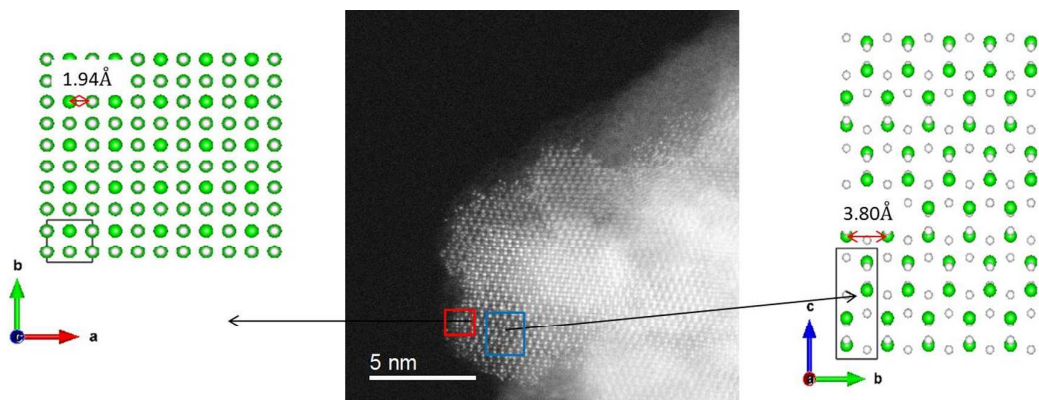

**Figure S3.** HAADF image of SPP treated ST-1 TiO<sub>2</sub>. The lattice diameter of two different places indicated in red and blue color box were obtained through simulation.

#### S4. Crystal lattice analysis:

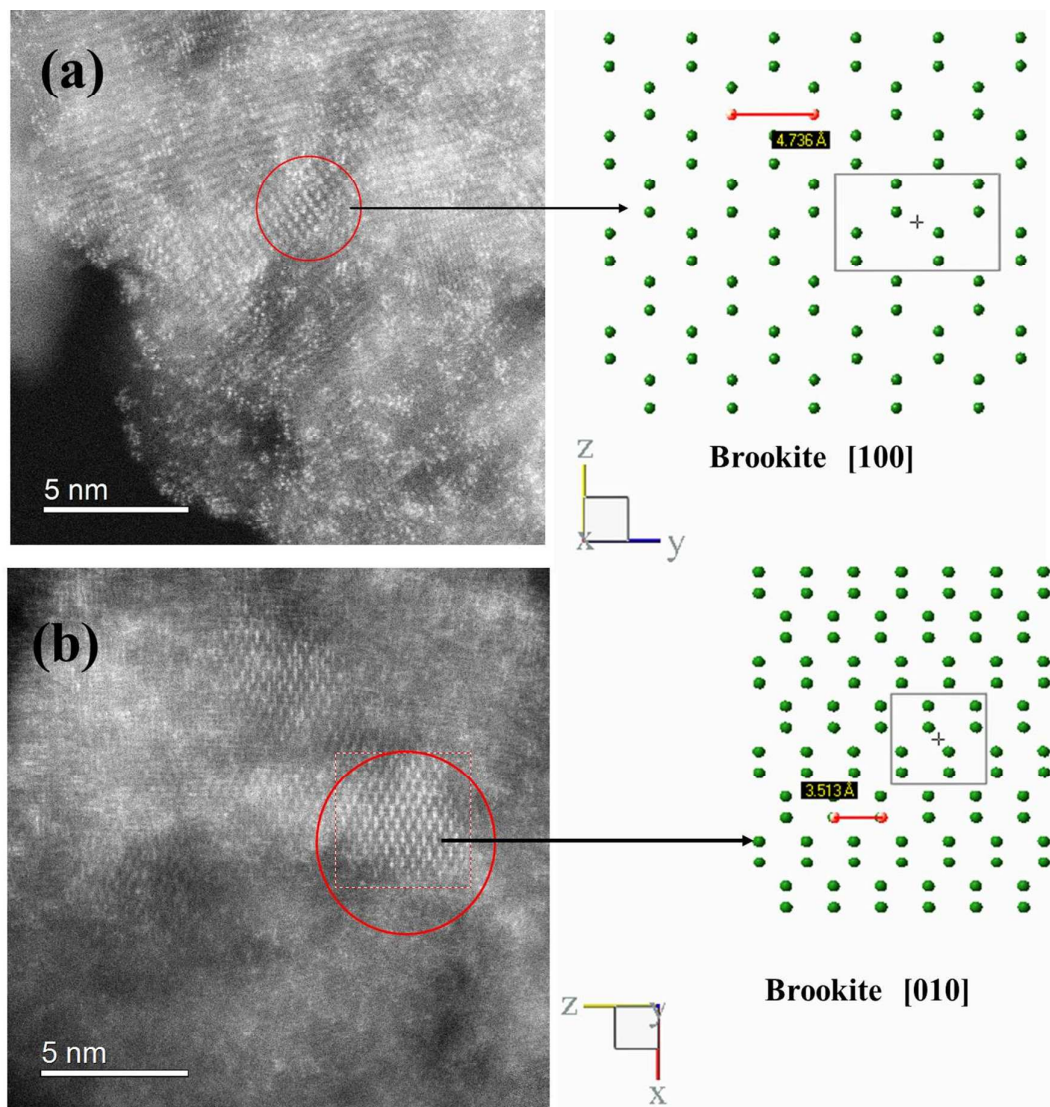

**Figure S4.** HAADF images of SPP treated ST-1 TiO<sub>2</sub>. The lattice diameter values of circled places in both (a) and (b) are obtained through simulation.

**S5. Crystal lattice analysis:**

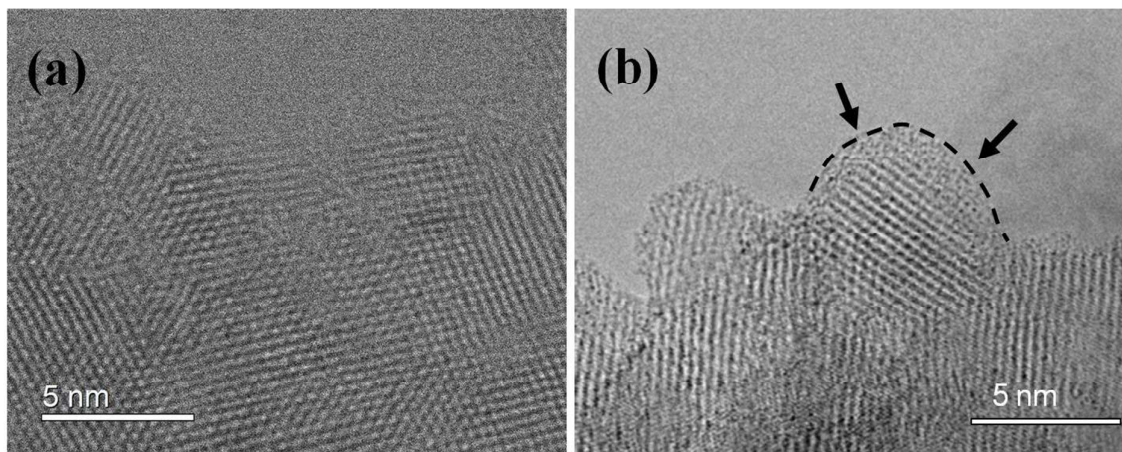

**Figure S5.** HAADF-STEM images of (a) untreated ST-1  $\text{TiO}_2$  and (b) SPP treated ST-1  $\text{TiO}_2$  (3 hrs). Note that dotted line in Figure S5 (b) indicates the amorphous  $\text{TiO}_2$  layer induced by hydrogen radical from solution plasma processing technique.

## S6. Defect analysis

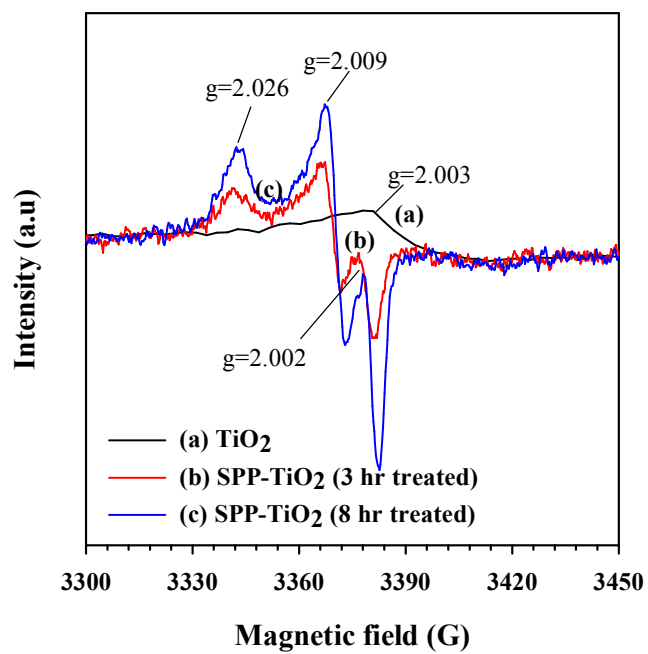

**Figure S6.** ESR spectra of untreated and SPP treated ST-1 TiO<sub>2</sub> samples.

## S7. Surface area analysis

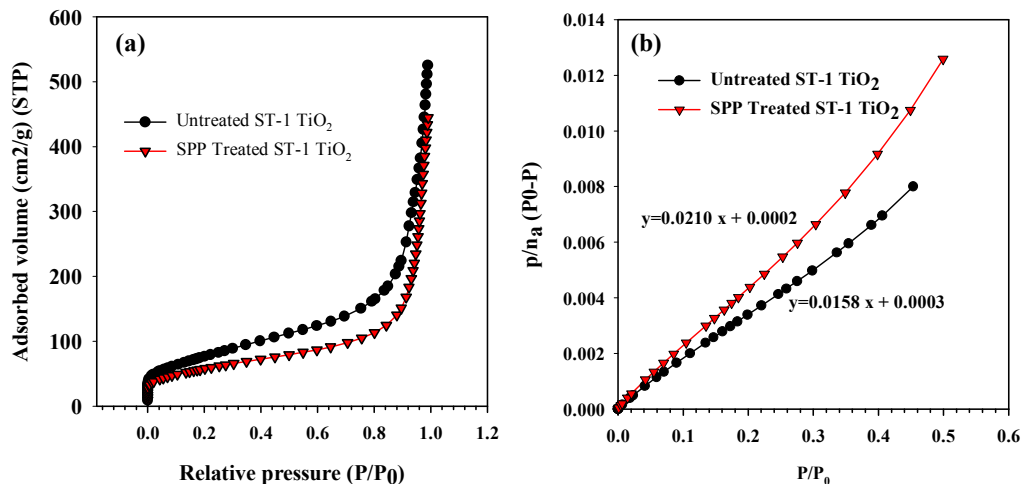

**Figure S7.** BET nitrogen adsorption isotherm pattern of untreated and SPP treated ST-1 TiO<sub>2</sub>.

**Table S1.** Surface area analysis of untreated and SPP treated ST-1 TiO<sub>2</sub> powder samples.

| Experiment condition | Surface area (m <sup>2</sup> /g) |
|----------------------|----------------------------------|
| Untreated            | 276                              |
| 3 hr SPP treatment   | 221                              |
| 8 hr SPP treatment   | 206                              |
| 15 hr SPP treatment  | 172                              |

## S8. Optical analysis

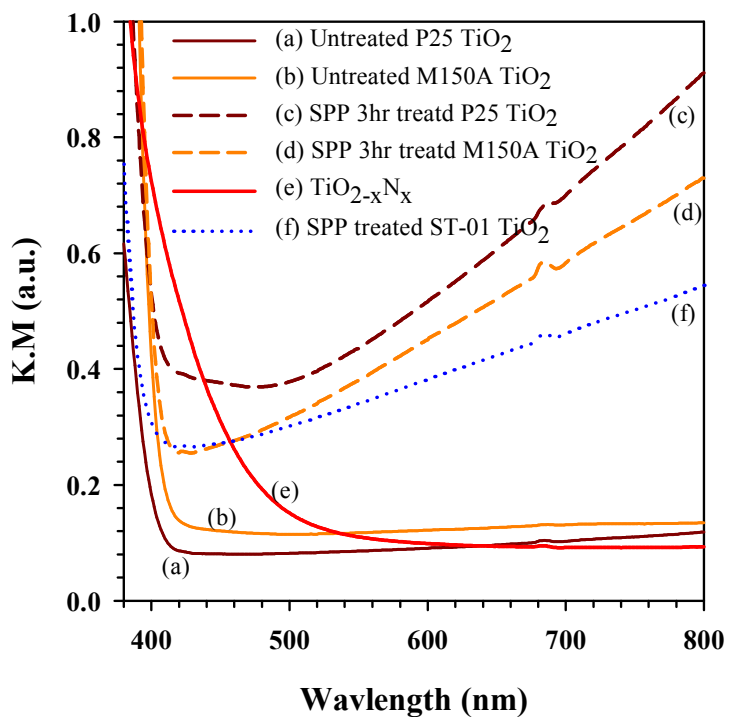

**Figure S8.** Optical absorbance spectra (Kubelka-Munk) of untreated and SPP treated TiO<sub>2</sub> samples. Note that untreated nitrogen doped TiO<sub>2</sub> (TiO<sub>2-x</sub>N<sub>x</sub>) is compared in this spectra.



### S9. Light irradiation wavelength dependence photocatalytic activity

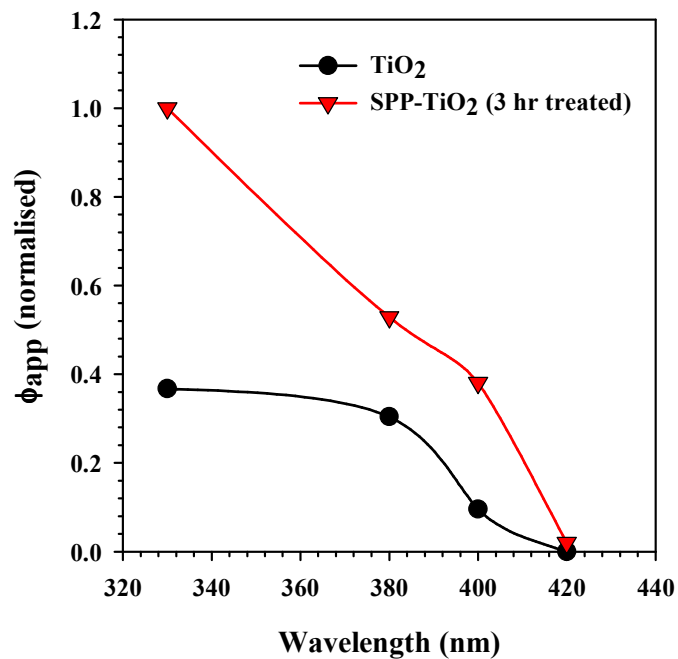

**Figure S9.** Comparison of photocatalytic acetaldehyde degradation between untreated and SPP treated ST-1  $TiO_2$  sample at different wavelength of light irradiation.
